# Supplementary material for: Metal-free ionic liquid-derived electrocatalyst for high-performance oxygen reduction in acidic and alkaline electrolytes
Source: Royal Society of Chemistry journal article supplement (doi:10.1039/c4mh00123k), 2014-07-16
Supplement: c4mh00123k1.pdf [file c4mh00123k1.pdf]

## Supplementary information

### **Metal-free Ionic Liquid-derived Electrocatalyst for High-Performance Oxygen Reduction in Acidic and Alkaline Electrolytes**

K. Elumeeva\*, M. Antonietti, N. Fechner and T. P. Feller

Colloid Chemistry Department, Max-Planck Institute of Colloids and Interfaces, Am Mühlenberg 1, 14476 Potsdam, Germany. E-mail: karina.elumeeva@mpikg.mpg.de.

#### *Supplementary Figures*

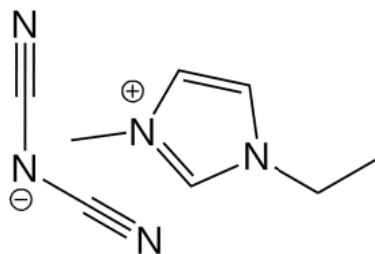

**Fig. S1.** 1-ethyl-3-methylimidazolium dicyanamide (Emim-dca).

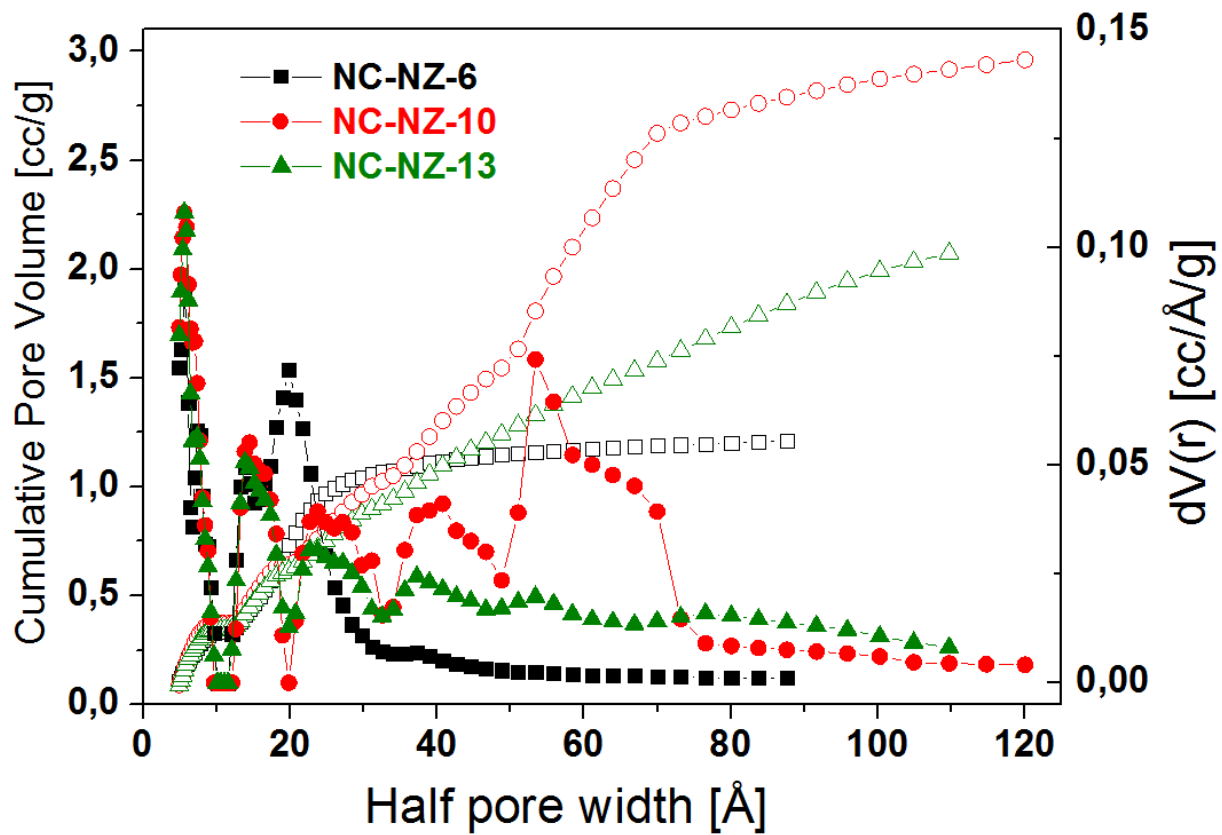

**Fig. S2.** Pore size distribution and cumulative pore volume of NCs obtained using different mass ratios of ionic liquid and NZ salt melt.

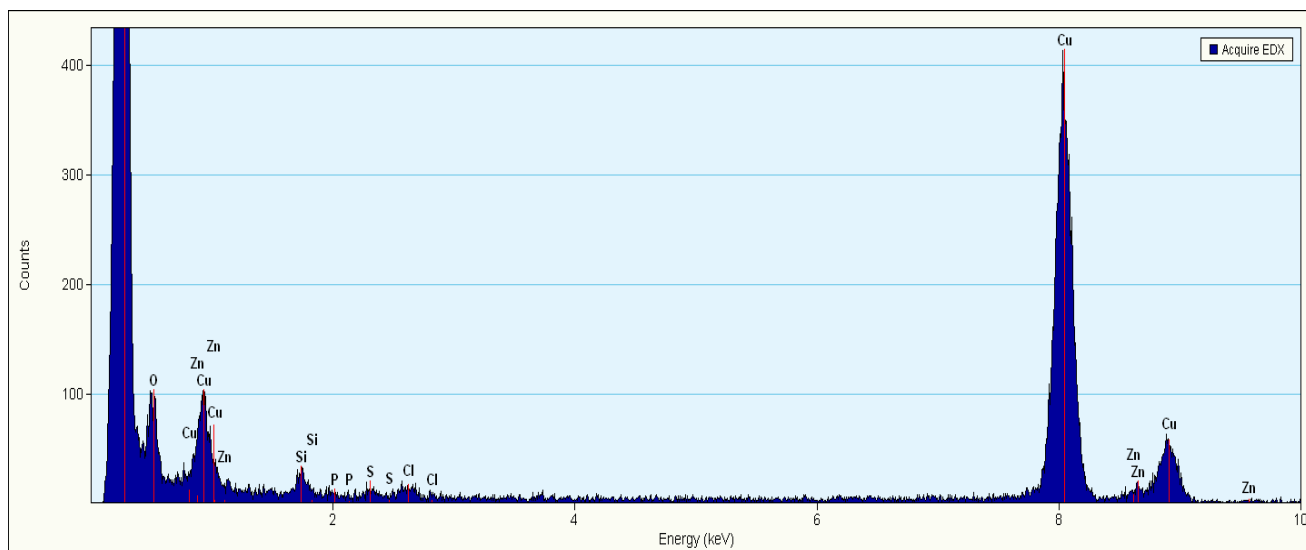

**Fig. S3.** EDX spectra of NC-NZ-13 depicting the absence of transition metal impurities except Zn that comes from salt templating method of synthesis.

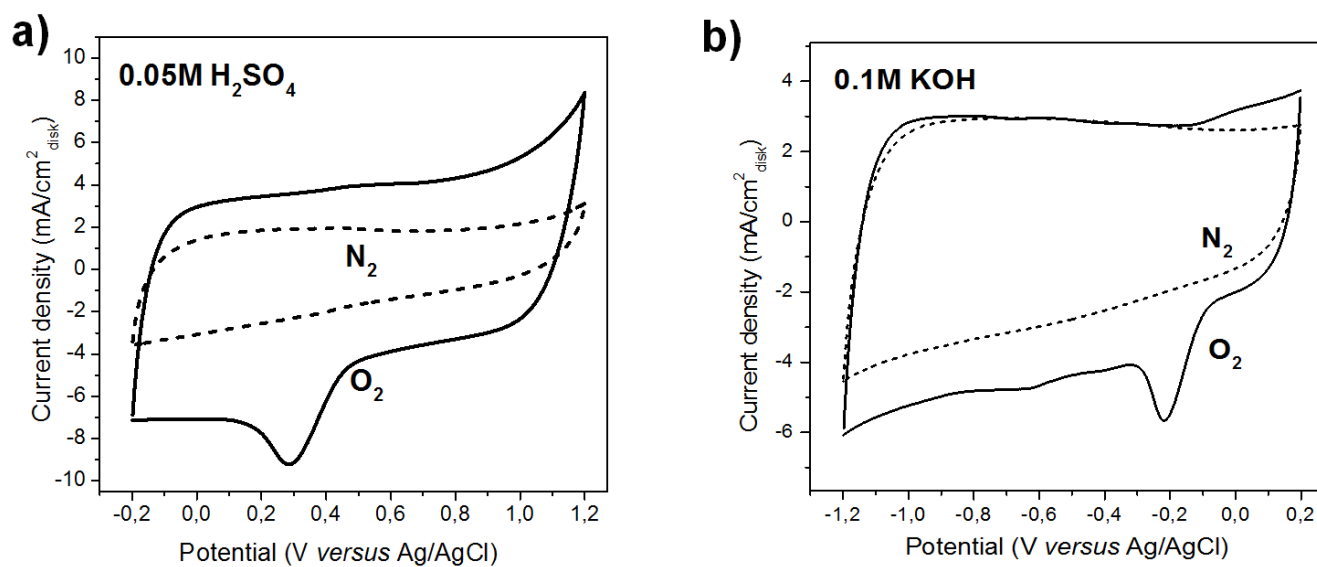

**Fig. S4.** CV curves obtained for NC-NZ-13 at scan rate 100mVs<sup>-1</sup> in N<sub>2</sub> (dash) and O<sub>2</sub> (solid) saturated (a) 0.05M H<sub>2</sub>SO<sub>4</sub> and (b) 0.1M KOH solutions.

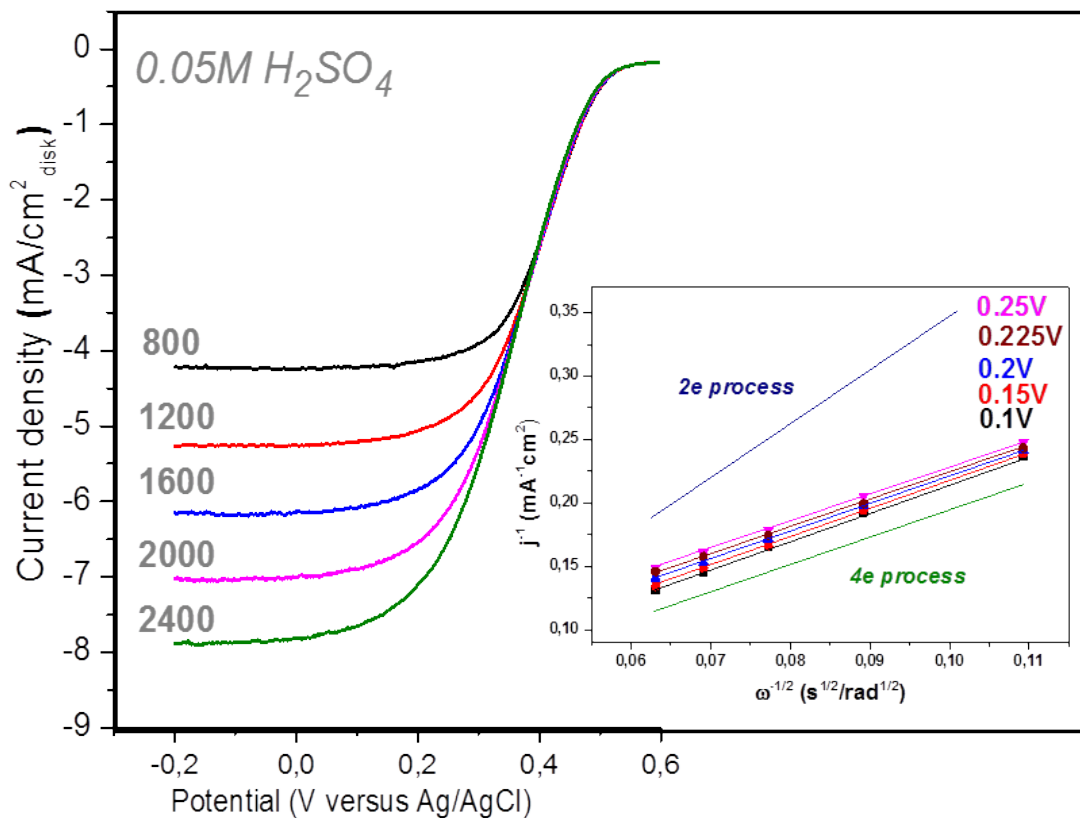

**Fig. S5.** Rotating-disk voltammograms of NC-NZ-13 (loading of 0.21 mgcm<sup>-2</sup>) in O<sub>2</sub>-saturated 0.05M H<sub>2</sub>SO<sub>4</sub> with a sweep rate of 10 mVs<sup>-1</sup> at different rotation speeds. The insert shows corresponding Koutecky-Levich plots at different potentials. The calculated number of transferred electrons was found to be in the range 3.95-4.03 suggesting a 4e oxygen reduction process.

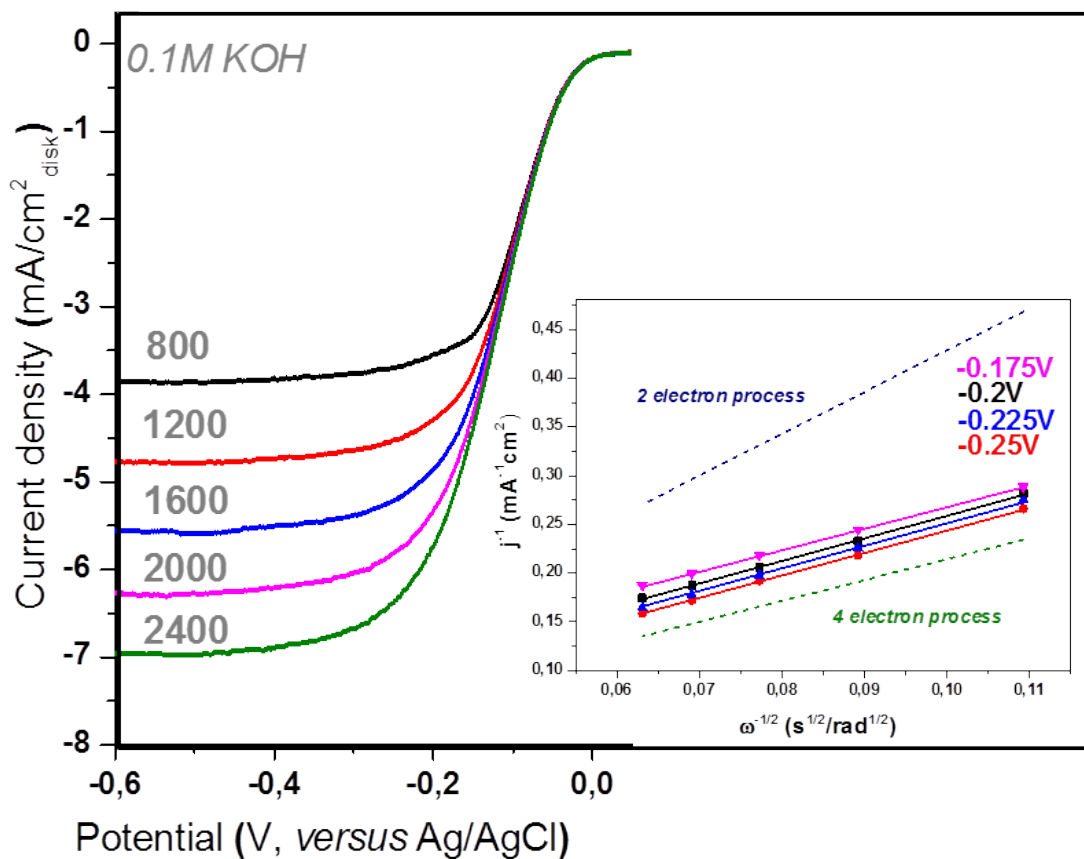

**Fig. S6.** Rotating-disk voltammograms of NC-NZ-13 (loading of 0.21 mgcm<sup>-2</sup>) in O<sub>2</sub>-saturated 0.1M KOH with a sweep rate of 10 mVs<sup>-1</sup> at different rotation speeds. The insert shows corresponding Koutecky-Levich plots at different potentials. The calculated number of transferred electrons was found to be in the range 3.96-4.1 suggesting a 4e oxygen reduction process.
